# Supplementary material for: Global Landscape Review of Serotype-Specific Invasive Pneumococcal Disease Surveillance among Countries Using PCV10/13: The Pneumococcal Serotype Replacement and Distribution Estimation (PSERENADE) Project
Source: PubMed Central journal article supplement (PMC8066045; doi:10.3390/microorganisms9040742), 2021-04-02
Supplement: microorganisms-09-00742-s001.pdf [file microorganisms-09-00742-s001.pdf]

# Global landscape review of serotype-specific invasive pneumococcal disease surveillance among countries using PCV10/13: The Pneumococcal Serotype Replacement and Distribution Estimation (PSERENADE) Project

## Table of Contents

|                                                                                                                                        |                               |
|----------------------------------------------------------------------------------------------------------------------------------------|-------------------------------|
| Search Terms .....                                                                                                                     | Error! Bookmark not defined.  |
| Table S1. Surveillance data sources for sites in PSERENADE. ....                                                                       | 5                             |
| Table S2. PCV-using countries with IPD surveillance, whether included in PSERENADE and if so whether incidence data were provided..... | 9                             |
| Table S3. Characteristics of data in PSERENADE by surveillance site.....                                                               | 12                            |
| References.....                                                                                                                        | Error! Bookmark not defined.7 |

## Search Terms

### EMBASE (with Medline)

1. Streptococcus pneumoniae/
2. pneumococcal infection/
3. pneumococcal meningitis/
4. Streptococcus pneumonia/
5. Pneumococcus vaccine/
6. streptococcus pneumoniae.mp.
7. pneumococcus.mp.
8. s pneumoniae.mp.
9. pneumococci.mp.
10. streptococcus pneumoniae meningitis.mp.
11. pneumococcal meningitis.mp.
12. pneumococcal bacteremia.mp.
13. pneumococcal pneumonia.mp.
14. invasive pneumococcal.mp.
15. pneumococcal conjugate.mp.
16. pneumococc\* vaccin\*.mp.
17. pcv?10.mp.
18. pcv?13.mp.
19. prev?nar.mp.
20. synflorix.mp.
21. ten?valent.mp.
22. thirteen?valent.mp.
23. 10?valent.mp.
24. 13?valent.mp.
25. 1 OR 2 OR 3 OR 4 OR 5 OR 6 OR 7 OR 8 OR 9 OR 10 OR 11 OR 12 OR 13 OR 14 OR 15 OR 16 OR 17 OR 18 OR 19 OR 20 OR 21 OR 22 OR 23 OR 24
26. serotype/
27. sero?type\*.mp.
28. serogroup\*.mp.
29. vaccine?type.mp.
30. 26 OR 27 OR 28 OR 29
31. 25 AND 30
32. Limit 40 to "human and yr=2011-Current"

### PubMed

((Streptococcus pneumoniae [MeSH] OR Pneumococcal Infections [MeSH] OR Bacteremia [MeSH] OR Pneumococcal Vaccines [MeSH] OR "Streptococcus pneumoniae"[tw] OR pneumococcus[tw] OR "s pneumoniae"[tw] OR pneumococci[tw] OR "pneumococcal meningitis"[tw] OR "pneumococcal bacteremia"[tw] OR "pneumococcal bacteraemia"[tw] OR "pneumococcal pneumonia"[tw] OR "invasive pneumococcal"[tw] OR "pneumococcal conjugate"[tw] OR pneumococc\*[tw] vaccine\*[tw] OR pcv10[tw] OR "pcv 10"[tw] OR "pcv-10"[tw] OR pcv13[tw] OR "pcv 13"[tw] OR "pcv-13"[tw] OR prevnar[tw] OR prevenar[tw] OR synflorix[tw] OR "ten valent"[tw] OR "ten-valent"[tw] OR "thirteen valent"[tw] OR "thirteen-valent"[tw] OR "10valent"[tw] OR "10 valent"[tw] OR "10-valent"[tw] OR "13valent"[tw] OR "13 valent"[tw] OR "13-valent"[tw]) AND (Serogroup [MeSH] OR serotype\*[tw] OR sero type\*[tw] OR

serogroup\*[tw] OR vaccine type\*[tw] OR vaccine-type\*[tw])) AND (("2011/01/01"[PDAT] :  
"2018/12/31"[PDAT]) AND "humans"[MeSH Terms])

### Global Health Database

1. Streptococcus pneumoniae.mp. OR pneumococcus.mp. OR s pneumoniae.mp. OR pneumococci.mp. OR pneumococcal conjugate.mp. OR pneumococc\* vaccin\*.mp. OR streptococcus pneumoniae meningitis.mp. OR pneumococcal meningitis.mp. OR pneumococcal bacteremia.mp. OR pneumococcal pneumonia.mp. OR invasive pneumococcal.mp. OR pcv?10.mp. OR pcv?13.mp. OR prev?nar.mp. OR synflorix.mp. OR ten?valent.mp. OR thirteen?valent.mp. OR 10?valent.mp. OR 13?valent.mp.
2. sero?type\*.mp. OR serogroup\*.mp. OR vaccine?type.mp.
3. 1 AND 2
4. Limit 3 to yr="2011–Current"

### Web of Science (All Databases)

1. ((Streptococcus NEAR/0 pneumoniae) OR pneumococcus OR (s NEAR/0 pneumoniae) OR pneumococci OR (pneumococcal NEAR/0 conjugate) OR (pneumococc\* NEAR/0 vaccin\*) OR (streptococcus NEAR/0 pneumoniae NEAR/1 meningitis) OR (pneumococcal NEAR/0 meningitis) OR (pneumococcal NEAR/0 bacteremia) OR (pneumococcal NEAR/0 bacteraemia) OR (pneumococcal NEAR/0 pneumonia) OR (invasive NEAR/0 pneumococcal) OR pcv10 OR pcv 10 OR pcv-10 OR pcv13 OR pcv 13 OR pcv-13 OR prevenar OR prevnar OR synflorix OR ten valent OR ten-valent OR thirteen valent OR thirteen-valent OR 10valent OR 10 valent OR 10-valent OR 13valent OR 13 valent OR 13-valent)
2. serotype\* OR (sero NEAR/0 type\*) OR serogroup\* OR vaccine type OR vaccine type OR vaccine-type
3. 1 AND 2
4. Limit 3 to yr="2011–2018"

### Global Index Medicus

1. ((Streptococcus pneumoniae OR pneumococcus OR s pneumoniae OR pneumococci OR pneumococcal conjugate OR pneumococc\* vaccin\* OR streptococcus pneumoniae meningitis OR pneumococcal meningitis OR pneumococcal bacteremia OR pneumococcal bacteraemia OR pneumococcal pneumonia OR invasive pneumococcal OR pcv10 OR pcv 10 OR pcv-10 OR pcv13 OR pcv 13 OR pcv-13 OR prevenar OR prevnar OR synflorix OR ten valent OR ten-valent OR thirteen valent OR thirteen-valent OR 10valent OR 10 valent OR 10-valent OR 13valent OR 13 valent OR 13-valent) AND (serotype\* OR sero type\* OR serogroup\* OR vaccine type OR vaccine type OR vaccine-type))
2. Year limits: 2011–2018

### Pascal

1. ("Streptococcus pneumoniae" OR pneumococcus OR "s pneumoniae" OR pneumococci OR "pneumococcal conjugate" OR "pneumococc\* vaccin\*" OR "streptococcus pneumoniae meningitis" OR "pneumococcal meningitis" OR "pneumococcal bacter\*emia" OR "pneumococcal pneumonia" OR "invasive pneumococcal" OR pcv\*10 OR pcv\*13 OR prev\*nar OR synflorix OR ten\*valent OR thirteen\*valent OR 10\*valent OR 13\*valent)

2. (sero\*type\* OR serogroup\* OR vaccine\*type)
3. 1 AND 2
4. 2011 TO 2018

#### Africa Wide Information

1. ((Streptococcus pneumoniae OR pneumococcus OR s pneumoniae OR pneumococci OR pneumococcal conjugate OR pneumococc\* vaccin\* OR streptococcus pneumoniae meningitis OR pneumococcal meningitis OR pneumococcal bacteremia OR pneumococcal bacteraemia OR pneumococcal pneumonia OR invasive pneumococcal OR pcv10 OR pcv 10 OR pcv-10 OR pcv13 OR pcv 13 OR pcv-13 OR prevenar OR prevnar OR synflorix OR ten valent OR ten-valent OR thirteen valent OR thirteen-valent OR 10valent OR 10 valent OR 10-valent OR 13valent OR 13 valent OR 13-valent) AND (serotype\* OR sero type\* OR serogroup\* OR vaccine type OR vaccine type OR vaccine-type))
2. Year limit = 2011–2018

**Table S1.** Surveillance data sources for sites in PSERENADE

| Region                          | Site                                            | Name of Surveillance Site or Network                                                                                                                              |
|---------------------------------|-------------------------------------------------|-------------------------------------------------------------------------------------------------------------------------------------------------------------------|
| North America                   | Canada, Alberta                                 | Calgary Area Streptococcus pneumoniae Epidemiology Research (CASPER)                                                                                              |
|                                 | Canada, Ontario                                 | Toronto Invasive Bacterial Diseases Network (TIBDN)                                                                                                               |
|                                 | Canada, Quebec (excluding Nunavik)              | Quebec National Public Health Institute (Institut national de santé publique du Québec)                                                                           |
|                                 | Canada, Quebec-Nunavik                          |                                                                                                                                                                   |
|                                 | USA, ABCs                                       | Active Bacterial Core Surveillance (ABCs)                                                                                                                         |
|                                 | USA, Alaska                                     | Arctic Investigations Program (AIP)                                                                                                                               |
|                                 | USA, California                                 | Kaiser Permanente Northern California (KPNC)                                                                                                                      |
|                                 | USA, Massachusetts                              | Massachusetts Department of Public Health (MDPH)                                                                                                                  |
|                                 | USA, Southwest (Indigenous)                     | The Johns Hopkins Center for American Indian Health Active Bacterial Surveillance System                                                                          |
| USA, Utah                       | University of Utah and Intermountain Healthcare |                                                                                                                                                                   |
| Latin America and the Caribbean | Argentina                                       | Servicio Bacteriología Clínica, Departamento de Bacteriología, INEI -ANLIS "Dr. Carlos G. Malbrán" - Laboratorio Nacional de Referencia de <i>S. pneumoniae</i> . |
|                                 | Bolivia (SIREVA)                                | SIREVA II Network <sup>1</sup>                                                                                                                                    |
|                                 | Brazil                                          | National Reference Laboratory for Meningitis and Pneumococcal Infections, Institute Adolfo Lutz, Center of Bacteriology, São Paulo, State of São Paulo, Brazil    |
|                                 | Chile, Metropolitan Region                      | Instituto de Salud Pública de Chile                                                                                                                               |
|                                 | Chile, Non-Metropolitan Regions                 |                                                                                                                                                                   |
|                                 | Colombia (SIREVA)                               | Colombia SIREVA II <sup>2</sup>                                                                                                                                   |
|                                 | Costa Rica                                      | Centro Nacional de Referencia de Bacteriología                                                                                                                    |
|                                 | Dominican Republic (SIREVA)                     | SIREVA II Network <sup>1</sup>                                                                                                                                    |
|                                 | Ecuador (SIREVA, WHO)                           | SIREVA II Network <sup>1</sup> and WHO Global IB-VPD Surveillance Network <sup>3</sup>                                                                            |
|                                 | El Salvador (SIREVA, WHO)                       | SIREVA II Network <sup>1</sup> and WHO Global IB-VPD Surveillance Network <sup>3</sup>                                                                            |
|                                 | Guatemala (SIREVA)                              | SIREVA II Network <sup>1</sup>                                                                                                                                    |
|                                 | Honduras (SIREVA, WHO)                          | SIREVA II Network <sup>1</sup> and WHO Global IB-VPD Surveillance Network <sup>3</sup>                                                                            |
|                                 | Mexico (SIREVA)                                 | SIREVA II Network <sup>1</sup>                                                                                                                                    |
|                                 | Nicaragua (SIREVA, WHO)                         | SIREVA II Network <sup>1</sup> and WHO Global IB-VPD Surveillance Network <sup>3</sup>                                                                            |
|                                 | Panama (SIREVA)                                 | SIREVA II Network <sup>1</sup>                                                                                                                                    |
|                                 | Paraguay                                        | Laboratorio Central de Salud Pública                                                                                                                              |
|                                 | Peru (SIREVA, WHO)                              | SIREVA II Network <sup>1</sup> and WHO Global IB-VPD Surveillance Network <sup>3</sup>                                                                            |
| Uruguay (SIREVA)                | SIREVA II Network <sup>1</sup>                  |                                                                                                                                                                   |
| Venezuela (SIREVA)              | SIREVA II Network <sup>1</sup>                  |                                                                                                                                                                   |
| Europe                          | Austria (ECDC)                                  | ECDC <sup>4</sup>                                                                                                                                                 |
|                                 | Belgium                                         | Belgian National Reference Center of Streptococcus Pneumoniae                                                                                                     |
|                                 | Bulgaria                                        | Medical University of Sofia, Bulgaria                                                                                                                             |
|                                 | Czech Republic                                  | National Reference Laboratory for Streptococcal Infections (NIPH)                                                                                                 |
|                                 | Denmark                                         | IPD Surveillance, Statens Serum Institut (SSI)                                                                                                                    |
|                                 | Finland                                         | National Institute for Health and Welfare (THL)                                                                                                                   |
|                                 | France                                          | Epibac Santé Publique France and Pneumococcus Regional Observatory - National Reference Laboratory-Pneumococcus Regional Observatory (ORP-CNRP)                   |
|                                 | Germany                                         | German National Reference Center for Streptococci (GNRCS)                                                                                                         |
|                                 | Greece                                          | Department for Epidemiological Surveillance and Intervention of the National Public Health Organization and National Reference Laboratory for Meningitis          |
|                                 | Iceland                                         | Landspítali University Hospital                                                                                                                                   |
|                                 | Ireland                                         | Irish Meningitis and Sepsis Reference Laboratory (IMSRL); Health Protection Surveillance Centre (HPSC)                                                            |

|                                           |                                                     |                                                                                                                                           |
|-------------------------------------------|-----------------------------------------------------|-------------------------------------------------------------------------------------------------------------------------------------------|
|                                           | Italy                                               | Italian National Institute of Health (Istituto Superiore di Sanità, ISS)                                                                  |
|                                           | Latvia                                              | The Centre for Disease Prevention and Control of Latvia (CDPC)                                                                            |
|                                           | Lithuania (ECDC)                                    | ECDC ECDC <sup>4</sup>                                                                                                                    |
|                                           | Netherlands                                         | Netherlands Reference Laboratory for Bacterial Meningitis (NRLBM)                                                                         |
|                                           | Norway                                              | Norwegian Surveillance System for Communicable Diseases                                                                                   |
|                                           | Poland                                              | National Reference Centre for Bacterial Meningitis                                                                                        |
|                                           | Slovakia                                            | Slovak National Surveillance Reference Center for Pneumococcal and Haemophilus Diseases                                                   |
|                                           | Slovenia                                            | National Institute of Public Health (Nacionalni inštitut za javno zdravje)                                                                |
|                                           | Spain, Catalonia                                    | Public Health Agency of Catalonia                                                                                                         |
|                                           | Spain, Madrid                                       | Consejería de Sanidad de la Comunidad de Madrid                                                                                           |
|                                           | Spain, Navarra                                      | Instituto de Salud Pública de Navarra                                                                                                     |
|                                           | Sweden                                              | The Public Health Agency of Sweden                                                                                                        |
|                                           | Switzerland                                         | Swiss Federal Office of Public Health (FOPH)                                                                                              |
|                                           | UK, England                                         | Immunisation and Countermeasures Division and Respiratory and Vaccine Preventable Bacteria Reference Unit (RVPBRU), Public Health England |
|                                           | UK, Scotland                                        | Health Protection Scotland Pneumococcal Invasive Disease Enhanced Reporting (SPIDER)                                                      |
| <b>Sub-Saharan Africa</b>                 | Benin (WHO)                                         | WHO Global IB-VPD Surveillance Network <sup>3</sup>                                                                                       |
|                                           | Cameroon (WHO)                                      | WHO Global IB-VPD Surveillance Network <sup>3</sup>                                                                                       |
|                                           | Ethiopia (WHO)                                      | WHO Global IB-VPD Surveillance Network <sup>3</sup>                                                                                       |
|                                           | Kenya, Asembo                                       | Kenya Medical Research Institute (KEMRI) and US CDC Population Based Infectious Disease Surveillance (PBIDS)                              |
|                                           | Kenya, Kibera                                       |                                                                                                                                           |
|                                           | Kenya, Kilifi                                       | KEMRI-Wellcome Trust Research Programme (KWTRP)                                                                                           |
|                                           | Madagascar (WHO)                                    | WHO Global IB-VPD Surveillance Network <sup>3</sup>                                                                                       |
|                                           | Malawi, Blantyre District                           | Malawi-Liverpool-Wellcome Trust Clinical Research Programme (MLW)                                                                         |
|                                           | South Africa                                        | Group for Enteric, Respiratory, and Meningeal Disease Surveillance in South Africa (GERMS-SA)                                             |
|                                           | The Gambia, Basse                                   | Basse Health and Demographic Surveillance System (BHDSS)                                                                                  |
| Zimbabwe (WHO)                            | WHO Global IB-VPD Surveillance Network <sup>3</sup> |                                                                                                                                           |
| <b>Northern Africa &amp; Western Asia</b> | Israel                                              | Israeli Pediatric Bacteremia and Meningitis Group                                                                                         |
|                                           | Morocco, Grand Casablanca                           | Ibn Rochd University Hospital Centre of Casablanca                                                                                        |
| <b>Asia</b>                               | Bangladesh                                          | Dhaka Shishu Hospital (DSH), Shishu Shasthya Foundation Hospital, & Kumudini Women's Medical College Hospital                             |
|                                           | Hong Kong                                           | Public Health Laboratory Services Branch Centre (PHLSBC) Hong Kong                                                                        |
|                                           | Japan                                               | Pediatric IPD Surveillance Group, Japan and Adult IPD Surveillance Group, Japan                                                           |
|                                           | Mongolia                                            | National Center of Communicable Diseases (NCCD), Ministry of Health, Mongolia                                                             |
|                                           | Singapore                                           | Singapore Ministry of Health                                                                                                              |
| <b>Oceania</b>                            | Australia (Non-Indigenous)                          | National Notifiable Diseases Surveillance System (NNDSS) of the Communicable Diseases Network Australia (CDNA)                            |
|                                           | Australia, Northern Territory                       |                                                                                                                                           |
|                                           | Fiji                                                | Fiji IB-VPD New Vaccine Evaluation Project                                                                                                |
|                                           | New Zealand                                         | Institute of Environmental Science and Research (ESR)                                                                                     |

<sup>1</sup> Sistema de Redes de Vigilancia de los Agentes responsables de Neumonías y Meningitis (SIREVA II) Network Reports (2006-2016) [1]. <sup>2</sup> Vigilancia por Laboratorio de aislamientos invasores de Streptococcus pneumoniae Colombia 2006-2018 (SIREVA II) [2]. <sup>3</sup> WHO Global Invasive Bacterial Vaccine Preventable Disease (IB-VPD) Surveillance Network; Some sites had data from both the SIREVA and WHO Global IB-VPD networks to compile the most up-to-date data for all age groups [1,3]. <sup>4</sup> European Centre for Disease Prevention and Control (ECDC) European Surveillance System [4]

**Table S2.** PCV-using countries with IPD surveillance, whether included in PSERENADE and if so whether incidence data were provided. Y = yes; N = no.

| Region                          | Country             | Eligible for PSERENADE | Included in PSERENADE | Has incidence data (among PSERENADE sites) |
|---------------------------------|---------------------|------------------------|-----------------------|--------------------------------------------|
| North America                   | Canada              | Y                      | Y                     | Y                                          |
|                                 | United States       | Y                      | Y                     | Y                                          |
| Latin America and the Caribbean | Argentina           | Y                      | Y                     | N                                          |
|                                 | Bolivia             | Y                      | Y                     | N                                          |
|                                 | Brazil              | Y                      | Y                     | Y                                          |
|                                 | Chile               | Y                      | Y                     | Y                                          |
|                                 | Colombia            | Y                      | Y                     | N                                          |
|                                 | Costa Rica          | Y                      | Y                     | N                                          |
|                                 | Dominican Republic  | Y                      | Y                     | N                                          |
|                                 | Ecuador             | Y                      | Y                     | N                                          |
|                                 | El Salvador         | Y                      | Y                     | N                                          |
|                                 | Guatemala           | Y                      | Y                     | N                                          |
|                                 | Honduras            | Y                      | Y                     | N                                          |
|                                 | Mexico              | Y                      | Y                     | N                                          |
|                                 | Nicaragua           | Y                      | Y                     | N                                          |
|                                 | Panama              | Y                      | Y                     | N                                          |
|                                 | Paraguay            | Y                      | Y                     | N                                          |
|                                 | Peru                | Y                      | Y                     | N                                          |
|                                 | Trinidad and Tobago | Y                      | N                     | --                                         |
|                                 | Uruguay             | Y                      | Y                     | N                                          |
|                                 | Venezuela           | Y                      | Y                     | N                                          |
| Europe                          | Austria             | Y                      | Y                     | N                                          |
|                                 | Belgium             | Y                      | Y                     | Y                                          |
|                                 | Bulgaria            | Y                      | Y                     | N                                          |
|                                 | Czech Republic      | Y                      | Y                     | Y                                          |
|                                 | Denmark             | Y                      | Y                     | Y                                          |
|                                 | Finland             | Y                      | Y                     | Y                                          |
|                                 | France              | Y                      | Y                     | Y                                          |
|                                 | Germany             | Y                      | Y                     | Y                                          |
|                                 | Greece              | Y                      | Y                     | Y                                          |
|                                 | Hungary             | N                      | --                    | --                                         |
|                                 | Iceland             | Y                      | Y                     | Y                                          |
|                                 | Ireland             | Y                      | Y                     | Y                                          |
|                                 | Italy               | Y                      | Y                     | Y                                          |
|                                 | Latvia              | Y                      | Y                     | Y                                          |
|                                 | Lithuania           | Y                      | Y                     | N                                          |
|                                 | Luxembourg          | N                      | --                    | --                                         |
|                                 | Netherlands         | Y                      | Y                     | Y                                          |
|                                 | Norway              | Y                      | Y                     | Y                                          |
|                                 | Poland              | Y                      | Y                     | Y                                          |
|                                 | Portugal            | Y                      | N                     | --                                         |
| Slovakia                        | Y                   | Y                      | Y                     |                                            |
| Slovenia                        | Y                   | Y                      | Y                     |                                            |
| Spain                           | Y                   | Y                      | Y                     |                                            |
| Sweden                          | Y                   | Y                      | Y                     |                                            |
| Switzerland                     | Y                   | Y                      | Y                     |                                            |

|                           |                                           |            |    |    |    |
|---------------------------|-------------------------------------------|------------|----|----|----|
|                           | United Kingdom                            | Y          | Y  | Y  |    |
|                           | Angola                                    | N          | -- | -- |    |
|                           | Benin                                     | Y          | Y  | N  |    |
|                           | Burkina Faso                              | Y          | N  | -- |    |
|                           | Burundi                                   | N          | -- | -- |    |
|                           | Cote d'Ivoire                             | N          | -- | -- |    |
|                           | Cameroon                                  | Y          | Y  | N  |    |
|                           | Central African Republic                  | N          | -- | -- |    |
|                           | Democratic Republic of the Congo          | N          | -- | -- |    |
|                           | Eritrea                                   | N          | -- | -- |    |
|                           | eSwatini                                  | N          | -- | -- |    |
|                           | Ethiopia                                  | Y          | Y  | N  |    |
|                           | Gambia, The                               | Y          | Y  | Y  |    |
|                           | Ghana                                     | Y          | N  | -- |    |
|                           | Kenya                                     | Y          | Y  | Y  |    |
| <b>Sub-Saharan Africa</b> | Lesotho                                   | N          | -- | -- |    |
|                           | Madagascar                                | Y          | Y  | N  |    |
|                           | Malawi                                    | Y          | Y  | Y  |    |
|                           | Mali                                      | Y          | N  | -- |    |
|                           | Mozambique                                | Y          | N  | -- |    |
|                           | Namibia                                   | N          | -- | -- |    |
|                           | Niger                                     | N          | -- | -- |    |
|                           | Nigeria                                   | N          | -- | -- |    |
|                           | Rwanda                                    | N          | -- | -- |    |
|                           | Senegal                                   | N          | -- | -- |    |
|                           | Sierra Leone                              | N          | -- | -- |    |
|                           | South Africa                              | Y          | Y  | Y  |    |
|                           | Tanzania                                  | N          | -- | -- |    |
|                           | Togo                                      | Y          | N  | -- |    |
|                           | Uganda                                    | N          | -- | -- |    |
|                           | Zambia                                    | N          | -- | -- |    |
|                           | Zimbabwe                                  | Y          | Y  | N  |    |
|                           | <b>Northern Africa &amp; Western Asia</b> | Armenia    | N  | -- | -- |
|                           |                                           | Azerbaijan | N  | -- | -- |
|                           |                                           | Bahrain    | N  | -- | -- |
| Cyprus                    |                                           | Y          | N  | -- |    |
| Georgia                   |                                           | N          | -- | -- |    |
| Israel                    |                                           | Y          | Y  | Y  |    |
| Kuwait                    |                                           | Y          | N  | -- |    |
| Morocco                   |                                           | Y          | Y  | Y  |    |
| Oman                      |                                           | N          | -- | -- |    |
| Qatar                     |                                           | N          | -- | -- |    |
| Saudi Arabia              |                                           | Y          | N  | -- |    |
| Sudan                     |                                           | N          | -- | -- |    |
| Turkey                    |                                           | Y          | N  | -- |    |
| Yemen                     | Y                                         | N          | -- |    |    |
| <b>Asia</b>               | Afghanistan                               | N          | -- | -- |    |
|                           | Bangladesh                                | Y          | Y  | Y  |    |
|                           | Cambodia                                  | N          | -- | -- |    |
|                           | Hong Kong                                 | Y          | Y  | Y  |    |
|                           | Japan                                     | Y          | Y  | Y  |    |

|                |                   |   |    |    |
|----------------|-------------------|---|----|----|
|                | Mongolia          | Y | Y  | Y  |
|                | Nepal             | N | -- | -- |
|                | Pakistan          | N | -- | -- |
|                | Philippines       | N | -- | -- |
|                | Republic of Korea | Y | N  | -- |
|                | Singapore         | Y | Y  | Y  |
|                | Taiwan            | Y | N  | -- |
|                | Uzbekistan        | N | -- | -- |
|                | Australia         | Y | Y  | Y  |
| <b>Oceania</b> | Fiji              | Y | Y  | Y  |
|                | New Zealand       | Y | Y  | Y  |
|                | Papua New Guinea  | N | -- | -- |

**Table S3.** Characteristics of data in PSERENADE by surveillance site.

| Region <sup>1</sup> | Site <sup>2</sup>               | Availability of data <sup>3</sup> |           |         |                |                 |                |                | Clinical syndrome linked | Specimen collected <sup>4</sup> | Additional pneumococcal detection methods <sup>5</sup> | Serotyping methods <sup>6</sup> |
|---------------------|---------------------------------|-----------------------------------|-----------|---------|----------------|-----------------|----------------|----------------|--------------------------|---------------------------------|--------------------------------------------------------|---------------------------------|
|                     |                                 | 0–17 years                        | ≥18 years | Pre-PCV | PCV7 period    | PCV10/13 period | Incidence data |                |                          |                                 |                                                        |                                 |
| N. Am.              | Canada, Alberta                 | Y                                 | Y         | Y       | Y              | Y               | Y              | Y              | Y                        | B, CSF, PF                      | --                                                     | Q                               |
|                     | Canada, Ontario                 | Y                                 | Y         | Y       | Y              | Y               | Y              | Y              | Y                        | B, CSF, PF                      | --                                                     | Q                               |
|                     | Canada, Quebec                  | Y                                 | Y         | Y       | Y              | Y               | Y              | Y              | N                        | B, CSF, PF                      | Nuc                                                    | Q                               |
|                     | USA, ABCs                       | Y                                 | Y         | Y       | Y              | Y               | Y              | Y              | Y                        | B, CSF, PF                      | --                                                     | Q, PCR70, WGS                   |
|                     | USA, Alaska                     | Y                                 | Y         | Y       | Y              | Y               | Y              | Y              | Y                        | B, CSF, PF                      | --                                                     | Q, L, PCR70                     |
|                     | USA, California                 | Y                                 | Y         | Y       | Y              | Y               | Y              | Y              | Y                        | B, CSF, PF                      | --                                                     | Q                               |
|                     | USA, Massachusetts              | Y                                 | N         | N       | Y <sup>7</sup> | Y <sup>7</sup>  | Y              | Y              | Y                        | B, CSF                          | --                                                     | Q                               |
|                     | USA, Southwest (Indigenous)     | Y                                 | Y         | Y       | Y              | Y               | Y              | Y              | Y                        | B, CSF                          | --                                                     | Q                               |
|                     | USA, Utah                       | Y                                 | N         | N       | N              | Y <sup>7</sup>  | Y              | Y              | B, CSF, PF               | Nuc                             | Q                                                      |                                 |
| LA & C              | Argentina                       | Y                                 | Y         | Y       | --             | Y               | N              | Y              | Y                        | B, CSF, PF                      | Nuc                                                    | Q, PCR37, PCR70                 |
|                     | Bolivia (SIREVA)                | Y                                 | Y         | Y       | --             | Y               | N              | N <sup>8</sup> | B, CSF, PF               | Ag                              | Q                                                      |                                 |
|                     | Brazil                          | Y                                 | Y         | Y       | --             | Y               | Y <sup>9</sup> | Y              | Y                        | B, CSF, PF                      | Nuc                                                    | Q, L, PCR70                     |
|                     | Chile, Metropolitan Region      | Y                                 | Y         | Y       | Y              | Y               | Y              | Y              | Y                        | B, CSF, PF                      | Nuc                                                    | Q                               |
|                     | Chile, Non-Metropolitan Regions | Y                                 | Y         | Y       | --             | Y               | Y              | Y              | Y                        | B, CSF, PF                      | Nuc                                                    | Q                               |
|                     | Colombia (SIREVA)               | Y                                 | Y         | Y       | --             | Y               | N              | N <sup>8</sup> | B, CSF, PF               | Nuc, Ag                         | Q, PCR37                                               |                                 |
|                     | Costa Rica                      | Y                                 | Y         | Y       | Y              | Y               | N              | Y              | B, CSF, PF               | Nuc                             | Q                                                      |                                 |
|                     | Dominican Republic (SIREVA)     | Y                                 | Y         | Y       | --             | Y               | N              | N <sup>8</sup> | B, CSF, PF               | Nuc, Ag                         | Q, PCR37                                               |                                 |
|                     | Ecuador (SIREVA, WHO)           | Y                                 | Y         | Y       | Y              | Y               | N              | Y              | B, CSF                   | Nuc, Ag                         | Q, PCR37                                               |                                 |
|                     | El Salvador (SIREVA, WHO)       | Y                                 | Y         | Y       | Y              | Y               | N              | Y              | B, CSF, PF               | Ag                              | Q                                                      |                                 |
|                     | Guatemala (SIREVA)              | Y                                 | Y         | Y       | --             | Y               | N              | N <sup>8</sup> | B, CSF, PF               | Nuc, Ag                         | Q                                                      |                                 |
|                     | Honduras (SIREVA, WHO)          | Y                                 | Y         | Y       | --             | Y               | N              | Y              | B, CSF, PF               | Ag                              | Q                                                      |                                 |
|                     | Mexico (SIREVA)                 | Y                                 | Y         | Y       | Y              | Y               | N              | N <sup>8</sup> | B, CSF, PF               | Nuc, Ag                         | Q, PCR37, PCR70                                        |                                 |
|                     | Nicaragua (SIREVA, WHO)         | Y                                 | Y         | Y       | --             | Y               | N              | Y              | B, CSF, PF               | Nuc, Ag                         | Q, PCR37                                               |                                 |
|                     | Panama (SIREVA)                 | Y                                 | Y         | Y       | Y              | Y               | N              | N <sup>8</sup> | B, CSF, PF               | Nuc, Ag                         | Q, PCR37                                               |                                 |
|                     | Paraguay                        | Y                                 | Y         | Y       | --             | Y               | N              | Y              | B, CSF, PF               | Nuc                             | Q, L, PCR37, PCR70                                     |                                 |

|                |                    |   |                 |                |                |   |                |                |                       |                       |                       |
|----------------|--------------------|---|-----------------|----------------|----------------|---|----------------|----------------|-----------------------|-----------------------|-----------------------|
|                | Peru (SIREVA, WHO) | Y | Y               | Y              | Y              | Y | N              | Y              | B, CSF, PF            | Nuc, Ag               | Q, PCR37              |
|                | Uruguay (SIREVA)   | Y | Y               | Y              | Y              | Y | N              | N <sup>8</sup> | B, CSF, PF            | Nuc, Ag               | Q, PCR37              |
|                | Venezuela (SIREVA) | Y | Y               | Y              | --             | Y | N              | N <sup>8</sup> | B, CSF, PF            | Nuc, Ag               | Q, PCR70              |
| <b>Europe</b>  | Austria (ECDC)     | Y | Y               | N              | N              | Y | N              | Y              | B, CSF                | Nuc                   | Q                     |
|                | Belgium            | Y | Y <sup>10</sup> | N              | Y              | Y | Y              | Y              | B, CSF, PF            | --                    | Q                     |
|                | Bulgaria           | Y | Y               | N              | --             | Y | N              | Y              | B, CSF, PF            | --                    | Q, L,<br>PCR37        |
|                | Czech Republic     | Y | Y               | Y              | --             | Y | Y              | Y              | B, CSF, PF            | Nuc                   | Q, PCR70              |
|                | Denmark            | Y | Y               | Y              | Y              | Y | Y              | Y              | B, CSF, PF            | Nuc, Ag               | Q, L,<br>PCR70        |
|                | Finland            | Y | Y               | Y              | --             | Y | Y              | Y              | B, CSF                | Nuc, Ag               | Q, L, PCR,<br>WGS     |
|                | France             | Y | Y               | Y              | Y              | Y | Y              | N              | B, CSF                | --                    | Q, L,<br>PCR70        |
|                | Germany            | Y | Y               | Y <sup>7</sup> | Y <sup>7</sup> | Y | Y              | Y              | B, CSF, PF            | Nuc, Ag               | Q, PCR70              |
|                | Greece             | Y | Y               | N              | --             | Y | Y <sup>9</sup> | Y              | B, CSF                | Nuc                   | Q, PCR17,<br>CST      |
|                | Iceland            | Y | Y               | Y              | --             | Y | Y              | N              | B, CSF                | Nuc, Ag               | L, PCR                |
|                | Ireland            | Y | Y               | Y              | Y              | Y | Y              | Y              | B, CSF                | Nuc, Ag               | Q, L, PCR             |
|                | Italy              | Y | Y               | N              | N              | Y | Y              | Y              | B, CSF, PF            | Nuc, Ag               | Q, L                  |
|                | Latvia             | Y | Y               | N              | Y <sup>7</sup> | Y | Y              | Y              | B, CSF, PF            | Nuc                   | Q, L, CST             |
|                | Lithuania (ECDC)   | Y | Y               | N              | N              | Y | N              | Y              | Unknown <sup>11</sup> | Nuc, Ag <sup>11</sup> | Unknown <sup>11</sup> |
|                | Netherlands        | Y | Y               | Y              | Y              | Y | Y              | Y              | B, CSF                | Nuc                   | Q, L                  |
|                | Norway             | Y | Y               | Y              | Y              | Y | Y              | N              | B, CSF, PF            | Nuc, Ag               | Q, NGS                |
|                | Poland             | Y | Y               | Y              | --             | Y | Y              | Y              | B, CSF, PF            | Nuc                   | Q, L,<br>PCR70        |
|                | Slovakia           | Y | Y               | Y              | Y              | Y | Y              | Y              | B, CSF, PF            | Nuc, Ag               | Q, L,<br>PCR70        |
|                | Slovenia           | Y | Y               | Y              | --             | Y | Y              | Y              | B, CSF                | Nuc                   | Q, CST                |
|                | Spain, Catalonia   | Y | Y               | N              | Y              | Y | Y              | Y              | B, CSF, PF            | Nuc, Ag               | Q, PCR37              |
| Spain, Madrid  | Y                  | Y | N               | Y              | Y              | Y | Y              | B, CSF, PF     | Nuc                   | Q, L,<br>PCR76        |                       |
| Spain, Navarra | Y                  | Y | Y               | Y              | Y              | Y | Y              | B, CSF, PF     | Nuc, Ag               | Q, PCR76              |                       |
| Sweden         | Y                  | Y | Y               | Y              | Y              | Y | N              | B, CSF, PF     | Nuc, Ag               | Q, L, GD              |                       |
| Switzerland    | Y                  | Y | Y               | Y              | Y              | Y | Y              | B, CSF, PF     | Nuc, Ag               | Q                     |                       |
| UK, England    | Y                  | Y | Y               | Y              | Y              | Y | N              | B, CSF, PF     | Nuc                   | Q, L                  |                       |

|                         |                           |   |   |                |                |                |   |   |            |         |             |
|-------------------------|---------------------------|---|---|----------------|----------------|----------------|---|---|------------|---------|-------------|
|                         | UK, Scotland              | Y | Y | Y              | Y              | Y              | Y | N | B, CSF, PF | Nuc, Ag | L           |
|                         | Benin (WHO)               | Y | N | N              | --             | Y              | N | Y | B, CSF     | Nuc     | PCR         |
|                         | Cameroon (WHO)            | Y | N | N              | --             | Y              | N | Y | B, CSF     | Nuc     | PCR         |
|                         | Ethiopia (WHO)            | Y | N | N              | --             | Y              | N | Y | B, CSF     | Nuc     | PCR         |
|                         | Kenya, Asembo             | Y | Y | Y              | --             | Y              | Y | Y | B          | --      | Q, PCR      |
|                         | Kenya, Kibera             | Y | Y | Y              | --             | Y              | Y | N | B          | --      | Q, PCR      |
| <b>Sub-Sah. Afr.</b>    | Kenya, Kilifi             | Y | Y | Y              | --             | Y              | Y | Y | B, CSF     | --      | Q, L, PCR   |
|                         | Madagascar (WHO)          | Y | N | N              | --             | Y              | N | Y | B, CSF     | Nuc     | PCR         |
|                         | Malawi, Blantyre District | Y | Y | Y              | --             | Y              | Y | Y | B, CSF     | --      | L, PCR37    |
|                         | South Africa              | Y | Y | Y              | Y              | Y              | Y | Y | B, CSF, PF | Nuc     | Q, PCR38    |
|                         | The Gambia, Basse         | Y | Y | Y              | Y              | Y              | Y | Y | B, CSF, PF | --      | L, PCR21    |
|                         | Zimbabwe (WHO)            | Y | N | N              | --             | Y              | N | Y | B, CSF     | Nuc     | PCR         |
| <b>N. Afr. &amp; W.</b> | Israel                    | Y | Y | Y <sup>7</sup> | Y              | Y              | Y | Y | B, CSF     | --      | Q           |
| <b>Asia</b>             | Morocco, Grand Casablanca | Y | Y | Y              | --             | Y              | Y | N | B, CSF, PF | Nuc     | Q, L, PCR70 |
|                         | Bangladesh                | Y | N | Y <sup>7</sup> | Y <sup>7</sup> | Y <sup>7</sup> | Y | Y | B, CSF     | Nuc, Ag | Q, PCR70    |
|                         | Hong Kong                 | Y | Y | N              | N              | Y              | Y | Y | B, CSF, PF | Nuc, Ag | PCR35       |
| <b>Asia</b>             | Mongolia                  | Y | N | Y <sup>7</sup> | --             | Y <sup>7</sup> | Y | Y | B, CSF, PF | Nuc, Ag | PCR70       |
|                         | Japan                     | Y | Y | Y <sup>7</sup> | Y <sup>7</sup> | Y              | Y | Y | B, CSF, PF | Nuc     | Q, PCR70    |
|                         | Singapore                 | Y | Y | Y              | Y              | Y              | Y | Y | B, CSF, PF | --      | Q           |
|                         | Australia                 | Y | Y | Y              | Y              | Y              | Y | Y | B, CSF     | Nuc     | Q, PCR      |
| <b>Oceania</b>          | Fiji                      | Y | Y | Y              | --             | Y              | Y | Y | B, CSF, PF | Ag      | Q, PCR70    |
|                         | New Zealand               | Y | Y | Y <sup>7</sup> | Y              | Y              | Y | Y | B, CSF, PF | Nuc, Ag | Q           |

<sup>1</sup>United Nations (UN) regions adapted from UN Statistics Division [5]. N. Am.: North America; LA & C: Latin America and the Caribbean; Sub-Sah. Afr.: Sub-Saharan Africa; N. Afr. & W. Asia: Northern Africa and Western Asia. <sup>2</sup>(WHO): WHO Global Invasive Bacterial Vaccine-Preventable Diseases (IB-VPD) Surveillance Network; (SIREVA): Pan American Health Organization Sistema de Redes de Vigilancia de los Agentes Responsables de Neumonias y Meningitis Bacterianas (SIREVA); (ECDC): The European Surveillance System (ECDC). <sup>3</sup>Availability of IPD data by age group and PCV period: -- PCV not universally used, no subsequent data; Y = Yes, data available; N = No, data not available. <sup>4</sup>Out of select specimen collection sites: B = Blood; CSF = cerebrospinal fluid; PF = pleural fluid. Some sites additionally indicated collection from "other" sterile sites that are not captured here. <sup>5</sup>Detection methods in addition to culture: -- indicates culture is the sole method of pneumococcal detection; Nuc = Nucleic acid detection; Ag = Antigen detection. <sup>6</sup>Where available, the number following "PCR" indicates the number of serotypes able to be identified by PCR: PCR37 = real-time polymerase chain reaction (21 assays/37 serotypes): serotypes detected vary by regional scheme (US [6], Latin America [7], Africa [8], and Asia [9]); PCR70 = conventional multiplex polymerase chain reaction (41 assays/70 serotypes): serotypes detected vary by regional scheme (US [10], Latin America [11], and Africa [12]); Q = Quellung reaction; L = Latex agglutination; WGS = Whole genome sequencing; NGS = Next generation sequencing; CST = Capsular sequence typing; GD = Gel diffusion. <sup>7</sup>Data only available for ages 0–17 years. <sup>8</sup>Clinical syndrome data are provided in SIREVA reports but are not serotype-specific, thus, not available in context relevant to table. <sup>9</sup>Incidence data are for pneumococcal meningitis only. <sup>10</sup>Adult IPD data available but not serotype-specific (serogrouped), therefore excluded from PSERENADE analyses. <sup>11</sup>Pneumococcal detection methods provided by ECDC reports [13–15]. Carriage studies suggest serotyping is determined through latex agglutination [16,17].

## References

1. Pan American Health Organization; World Health Organization. Sistema Regional de Vacunas (SIREVA) II. Available online: <https://www.paho.org/es/sireva> (accessed on 31 August 2020).
2. Dirección Redes en Salud Pública; Subdirección Laboratorio Nacional De Referencia; Grupo de Microbiología. Vigilancia por Laboratorio de aislamientos invasores de *Streptococcus pneumoniae* Colombia 2006-2018: SIREVA II; Instituto Nacional de Salud: Bogotá, Colombia, 2019; pp. 1–16.
3. World Health Organization. Invasive Bacterial Vaccine Preventable Diseases Laboratory Network. Available online: [http://www.who.int/immunization/monitoring\\_surveillance/burden/laboratory/IBVPD/en/](http://www.who.int/immunization/monitoring_surveillance/burden/laboratory/IBVPD/en/) (accessed on 5 January 2021).
4. European Center for Disease Prevention and Control. The European Surveillance System (TESSy). Available online: <https://www.ecdc.europa.eu/en/publications-data/european-surveillance-system-tesy> (accessed on 7 January 2021).
5. United Nations. Methodology: Geographic Regions. Available online: <https://unstats.un.org/unsd/methodology/m49/#geo-regions> (accessed on 22 December 2020).
6. Centers for Disease Control and Prevention. *Protocol for the Triplex Real Time PCR - S. Pneumoniae Serotyping - Clinical Specimens - United States (US) Scheme*; 2014; pp. 1–4.
7. Centers for Disease Control and Prevention. *Protocol for the Triplex Real Time PCR - S. Pneumoniae Serotyping - Clinical Specimens - Latin America (LA) Scheme*; 2014; pp. 1–4.
8. Centers for Disease Control and Prevention. *Protocol for the Triplex Real Time PCR - S. Pneumoniae Serotyping - Clinical Specimens - Africa Scheme*; 2014; pp. 1–4.
9. Centers for Disease Control and Prevention. *Protocol for the Triplex Real Time PCR - S. Pneumoniae Serotyping - Clinical Specimens - Asia Scheme*; 2014; pp. 1–4.
10. Centers for Disease Control and Prevention. *Protocol for Multiplex PCR - S. Pneumoniae SEROTYPING - Clinical Specimens and Pneumococcal Isolates (USA Set)*; 2014; pp. 1–5.
11. Centers for Disease Control and Prevention. *Protocol for Multiplex PCR - S. Pneumoniae SEROTYPING - Clinical Specimens - Latin America Set*; 2014; pp. 1–5.
12. Centers for Disease Control and Prevention. *Protocol for Multiplex PCR - S. Pneumoniae SEROTYPING - Clinical Specimens and Pneumococcal Isolates - African Set*; 2014; pp. 1–5.
13. European Center for Disease Prevention and Control. *Invasive Pneumococcal Disease - Annual Epidemiological Report for 2018*; Stockholm: ECDC, 2020; p. 1.
14. European Center for Disease Prevention and Control. Surveillance Systems Overview for 2017. Available online: <https://www.ecdc.europa.eu/en/publications-data/surveillance-systems-overview-2017> (accessed on 8 January 2021).
15. The European Commission. Commission Implementing Decision (EU) 2018/ 945 - of 22 June 2018 - on the Communicable Diseases and Related Special Health Issues to Be Covered by Epidemiological Surveillance as Well as Relevant Case Definitions. *Off. J. Eur. Union* **2018**, *1*, 74.
16. Usonis, V.; Stacevičienė, I.; Petraitiienė, S.; Vaičiūnienė, D.; Alasevičius, T.; Kiršlienė, J. Streptococcus Pneumoniae Nasopharyngeal Colonisation in Children Aged under Six Years with Acute Respiratory Tract Infection in Lithuania, February 2012 to March 2013. *Eurosurveillance* **2015**, *20*, 21079, doi:10.2807/1560-7917.ES2015.20.13.21079.
17. Stacevičienė, I.; Petraitiienė, S.; Vaičiūnienė, D.; Alasevičius, T.; Kiršlienė, J.; Usonis, V. Antibiotic Resistance of Streptococcus Pneumoniae, Isolated from Nasopharynx of Preschool Children with Acute Respiratory Tract Infection in Lithuania. *BMC Infect. Dis.* **2016**, *16*, 216, doi:10.1186/s12879-016-1544-9.
